# Supplementary material
Source: publisher figshare collection journal article supplement (https://gsajournals.figshare.com/ndownloader/files/12853529)
Supplement: Supplementary file 1 [file 12853529]

## Sheet: WH vs MB GO terms
Upregulated MB genes BP				Upregulated MB genes MF				Upregulated MB genes CC				Downregulated MB genes BP				Downpregulated MB genes MF				Downregulated MB genes CC
GO biological process complete	# of genes	Fold Enrichment	FDR	GO molecular function complete	# of genes	Fold Enrichment	FDR	GO cellular component complete	# of genes	Fold Enrichment	FDR	GO biological process complete	# of genes	Fold Enrichment	FDR	GO molecular function complete	# of genes	Fold Enrichment	FDR	GO cellular component complete	# of genes	Fold Enrichment	FDR
negative regulation of voltage-gated calcium channel activity (GO:1901386)	3	25.1	0.0297	acetylcholine receptor activity (GO:0015464)	4	14.35	0.0331	cAMP-dependent protein kinase complex (GO:0005952)	4	16.74	0.00695	response to ether (GO:0045472)	3	23.16	0.0242	G-protein coupled photoreceptor activity (GO:0008020)	6	17.37	0.00127	rhabdomere microvillus (GO:0035996)	4	18.53	0.00721
adenylate cyclase-inhibiting serotonin receptor signaling pathway (GO:0007198)	3	18.83	0.0446	dopamine neurotransmitter receptor activity (GO:0004952)	4	12.55	0.0443	muscle myosin complex (GO:0005859)	3	15.06	0.0399	compound eye corneal lens development (GO:0048058)	3	23.16	0.0241	photoreceptor activity (GO:0009881)	8	14.25	0.000178	inaD signaling complex (GO:0016027)	7	16.21	0.00015
negative regulation of calcium ion transmembrane transporter activity (GO:1901020)	3	18.83	0.0444	signaling adaptor activity (GO:0035591)	5	11.41	0.0148	M band (GO:0031430)	6	11.59	0.0016	retinoid metabolic process (GO:0001523)	3	23.16	0.0241	neuropeptide receptor activity (GO:0008188)	13	6.84	9.59e-05	rhabdomere membrane (GO:0033583)	4	15.44	0.0105
negative regulation of cation channel activity (GO:2001258)	3	18.83	0.0443	G-protein coupled amine receptor activity (GO:0008227)	8	10.04	0.000705	subsynaptic reticulum (GO:0071212)	5	11.41	0.00508	diterpenoid metabolic process (GO:0016101)	3	23.16	0.024	G-protein coupled peptide receptor activity (GO:0008528)	14	6.75	4.72e-05	rhabdomere (GO:0016028)	16	10.9	8.93e-09
negative regulation of calcium ion transmembrane transport (GO:1903170)	3	18.83	0.0441	G-protein coupled neurotransmitter receptor activity (GO:0099528)	7	8.79	0.00354	myofilament (GO:0036379)	4	11.16	0.0196	modulation of excitatory postsynaptic potential (GO:0098815)	3	23.16	0.024	peptide receptor activity (GO:0001653)	14	6.62	5.31e-05	microvillus (GO:0005902)	5	10.53	0.00815
G-protein coupled serotonin receptor signaling pathway (GO:0098664)	3	18.83	0.044	protein binding involved in protein folding (GO:0044183)	9	7.53	0.00119	chaperonin-containing T-complex (GO:0005832)	4	11.16	0.0194	detection of UV (GO:0009589)	5	19.3	0.00146	G-protein coupled receptor activity (GO:0004930)	28	5.54	9.67e-09	potassium channel complex (GO:0034705)	5	9.65	0.0104
regulation of voltage-gated calcium channel activity (GO:1901385)	3	18.83	0.0438	molecular adaptor activity (GO:0060090)	7	5.17	0.0445	chaperone complex (GO:0101031)	4	10.04	0.0251	notum cell fate specification (GO:0035310)	4	18.53	0.00735	signal transducer activity, downstream of receptor (GO:0005057)	13	4.94	0.00129	basement membrane (GO:0005604)	5	8.91	0.0126
adenylate cyclase-activating dopamine receptor signaling pathway (GO:0007191)	4	14.35	0.0191	neurotransmitter receptor activity (GO:0030594)	14	4.95	0.00044	A band (GO:0031672)	8	10.04	0.00023	phototransduction, UV (GO:0007604)	4	18.53	0.00733	protein tyrosine kinase activity (GO:0004713)	8	4.88	0.0384	extracellular matrix component (GO:0044420)	5	8.91	0.0124
regulation of calcium ion transmembrane transporter activity (GO:1901019)	4	14.35	0.019	structural constituent of cytoskeleton (GO:0005200)	8	4.78	0.0326	Sin3-type complex (GO:0070822)	5	9.66	0.00832	circadian temperature homeostasis (GO:0060086)	3	17.37	0.0369	cell adhesion molecule binding (GO:0050839)	8	4.88	0.0375	voltage-gated potassium channel complex (GO:0008076)	4	8.42	0.0462
regulation of calcium ion transmembrane transport (GO:1903169)	4	14.35	0.019	neuropeptide receptor activity (GO:0008188)	8	4.56	0.0411	sarcomere (GO:0030017)	18	8.53	1.15e-08	temperature homeostasis (GO:0001659)	3	17.37	0.0368	signal transducer, downstream of receptor, with serine/threonine kinase activity (GO:0004702)	10	4.29	0.0222	perivitelline space (GO:0098595)	5	7.72	0.02
anesthesia-resistant memory (GO:0007615)	7	13.52	0.000431	actin binding (GO:0003779)	23	4.51	5.72e-06	contractile fiber (GO:0043292)	21	8.37	7.92e-10	garland nephrocyte differentiation (GO:0061321)	3	17.37	0.0368	transcriptional activator activity, RNA polymerase II transcription regulatory region sequence-specific DNA binding (GO:0001228)	13	3.91	0.00712	extrinsic component of plasma membrane (GO:0019897)	13	6.41	4.76e-05
response to axon injury (GO:0048678)	5	12.55	0.00771	Rab GTPase binding (GO:0017137)	14	4.04	0.00208	contractile fiber part (GO:0044449)	20	8.37	2.01e-09	amnioserosa maintenance (GO:0046665)	4	15.44	0.0108	identical protein binding (GO:0042802)	21	3.12	0.00151	actin-based cell projection (GO:0098858)	6	5.34	0.0313
heat shock-mediated polytene chromosome puffing (GO:0035080)	4	11.16	0.0324	G-protein coupled receptor activity (GO:0004930)	18	3.86	0.00043	myofibril (GO:0030016)	19	8.22	6.29e-09	regulation of cardiocyte differentiation (GO:1905207)	4	13.23	0.0155	RNA polymerase II regulatory region sequence-specific DNA binding (GO:0000977)	23	2.99	0.00129	ion channel complex (GO:0034702)	14	4.63	0.000347
dopamine receptor signaling pathway (GO:0007212)	5	10.46	0.013	Ras GTPase binding (GO:0017016)	24	3.61	6.4e-05	Z disc (GO:0030018)	12	7.72	1.7e-05	rhodopsin mediated signaling pathway (GO:0016056)	8	13.23	7.27e-05	RNA polymerase II regulatory region DNA binding (GO:0001012)	23	2.89	0.0017	cation channel complex (GO:0034703)	9	4.34	0.0106
regulation of olfactory learning (GO:0090328)	4	10.04	0.0408	small GTPase binding (GO:0031267)	24	3.35	0.000156	I band (GO:0031674)	12	7.72	1.64e-05	response to light intensity (GO:0009642)	5	12.87	0.00467	sequence-specific DNA binding (GO:0043565)	59	2.86	1.55e-08	proteinaceous extracellular matrix (GO:0005578)	13	4.18	0.00126
polytene chromosome puffing (GO:0035079)	4	10.04	0.0406	GTPase binding (GO:0051020)	26	3.31	7.93e-05	histone deacetylase complex (GO:0000118)	6	6.85	0.00997	visual perception (GO:0007601)	13	12.54	8.8e-08	calcium ion binding (GO:0005509)	25	2.82	0.00122	transmembrane transporter complex (GO:1902495)	16	4.16	0.000304
establishment of apical/basal cell polarity (GO:0035089)	5	9.66	0.0166	GTPase activity (GO:0003924)	19	3.31	0.00142	myosin complex (GO:0016459)	7	6.28	0.006	heterophilic cell-cell adhesion via plasma membrane cell adhesion molecules (GO:0007157)	15	11.98	9.27e-09	signal transducer activity (GO:0004871)	60	2.81	6.68e-09	anchoring junction (GO:0070161)	16	4.12	0.000332
skeletal muscle tissue development (GO:0007519)	5	9.66	0.0165	guanyl ribonucleotide binding (GO:0032561)	21	3.27	0.000692	type I terminal bouton (GO:0061174)	6	5.79	0.0197	sensory perception of light stimulus (GO:0050953)	15	11.98	9.17e-09	molecular transducer activity (GO:0060089)	48	2.79	8.25e-07	adherens junction (GO:0005912)	16	4.12	0.000321
polarized epithelial cell differentiation (GO:0030859)	4	9.13	0.0492	guanyl nucleotide binding (GO:0019001)	21	3.25	0.0007	cytoplasmic side of plasma membrane (GO:0009898)	8	5.29	0.00611	cell fate specification involved in pattern specification (GO:0060573)	4	11.58	0.0215	protein homodimerization activity (GO:0042803)	17	2.79	0.0231	intrinsic component of plasma membrane (GO:0031226)	81	3.83	1.67e-20
vesicle transport along microtubule (GO:0047496)	4	9.13	0.0491	kinase binding (GO:0019900)	12	3.24	0.0377	cytoplasmic side of membrane (GO:0098562)	9	5.25	0.0031	photoperiodism (GO:0009648)	6	11.58	0.00185	signaling receptor activity (GO:0038023)	47	2.78	9.79e-07	integral component of plasma membrane (GO:0005887)	79	3.82	5.52e-20
establishment of epithelial cell apical/basal polarity (GO:0045198)	4	9.13	0.0489	purine ribonucleoside binding (GO:0032550)	20	3.18	0.00143	secretory vesicle (GO:0099503)	17	5.2	9.8e-06	thermotaxis (GO:0043052)	9	11.58	3.97e-05	protein kinase activity (GO:0004672)	29	2.75	0.000464	plasma membrane protein complex (GO:0098797)	28	3.79	1.12e-06
vesicle cytoskeletal trafficking (GO:0099518)	4	9.13	0.0488	GTP binding (GO:0005525)	20	3.18	0.00138	side of membrane (GO:0098552)	11	4.93	0.0013	phototransduction, visible light (GO:0007603)	11	11.08	3.73e-06	RNA polymerase II transcription factor activity, sequence-specific DNA binding (GO:0000981)	32	2.73	0.000183	transporter complex (GO:1990351)	16	3.78	0.000666
muscle system process (GO:0003012)	9	9.04	0.000281	ribonucleoside binding (GO:0032549)	20	3.12	0.00166	supramolecular fiber (GO:0099512)	37	4.69	2.58e-10	nephrocyte differentiation (GO:0061319)	6	10.69	0.0025	transmembrane signaling receptor activity (GO:0004888)	40	2.72	1.71e-05	extrinsic component of membrane (GO:0019898)	13	3.67	0.00368
regulation of centrosome cycle (GO:0046605)	5	8.97	0.0198	purine nucleoside binding (GO:0001883)	20	3.12	0.00162	supramolecular polymer (GO:0099081)	37	4.64	1.69e-10	renal filtration cell differentiation (GO:0061318)	6	10.69	0.0025	regulatory region nucleic acid binding (GO:0001067)	34	2.65	0.000195	postsynapse (GO:0098794)	10	3.51	0.0199
muscle contraction (GO:0006936)	6	8.37	0.00936	cytoskeletal protein binding (GO:0008092)	39	3.12	1.79e-06	supramolecular complex (GO:0099080)	37	4.6	1.47e-10	entrainment of circadian clock by photoperiod (GO:0043153)	5	10.53	0.0082	transcription regulatory region DNA binding (GO:0044212)	34	2.65	0.000182	cell junction (GO:0030054)	23	3.48	5.85e-05
response to ammonium ion (GO:0060359)	6	7.93	0.0119	nucleoside binding (GO:0001882)	20	3.04	0.0021	actin cytoskeleton (GO:0015629)	23	4.55	8.1e-07	synaptic target inhibition (GO:0016201)	5	10.53	0.00818	phosphotransferase activity, alcohol group as acceptor (GO:0016773)	36	2.65	0.000167	plasma membrane part (GO:0044459)	113	3.18	2.87e-23
establishment or maintenance of monopolar cell polarity (GO:0061339)	5	7.85	0.0291	microtubule binding (GO:0008017)	14	2.81	0.0464	transport vesicle (GO:0030133)	16	4.46	9.91e-05	compound eye cone cell differentiation (GO:0042675)	7	10.13	0.000983	protein serine/threonine kinase activity (GO:0004674)	23	2.64	0.00554	cell-cell junction (GO:0005911)	13	3.17	0.0104
establishment of monopolar cell polarity (GO:0061162)	5	7.85	0.029	signaling receptor activity (GO:0038023)	38	2.43	0.000297	exocytic vesicle (GO:0070382)	12	4.37	0.00162	cellular response to light stimulus (GO:0071482)	18	9.93	1.59e-09	signaling receptor binding (GO:0005102)	26	2.57	0.00426	neuromuscular junction (GO:0031594)	10	3.09	0.0445
adult somatic muscle development (GO:0007527)	5	7.85	0.0289	molecular transducer activity (GO:0060089)	38	2.4	0.000338	presynapse (GO:0098793)	26	4.32	2.7e-07	detection of visible light (GO:0009584)	13	9.71	8.8e-07	DNA binding transcription factor activity (GO:0003700)	49	2.5	1.06e-05	plasma membrane (GO:0005886)	159	3.05	3.26e-32
myofibril assembly (GO:0030239)	14	7.64	5.75e-06	transmembrane signaling receptor activity (GO:0004888)	32	2.36	0.00179	terminal bouton (GO:0043195)	11	4.31	0.00296	detection of light stimulus involved in sensory perception (GO:0050962)	5	9.65	0.0106	kinase activity (GO:0016301)	37	2.48	0.000224	cell periphery (GO:0071944)	166	2.86	3.84e-31
cAMP-mediated signaling (GO:0019933)	11	7.27	0.000153	enzyme binding (GO:0019899)	44	2.36	8.3e-05	axon terminus (GO:0043679)	12	4.24	0.00198	deactivation of rhodopsin mediated signaling (GO:0016059)	7	9.54	0.00126	transcription regulatory region sequence-specific DNA binding (GO:0000976)	26	2.38	0.00897	plasma membrane region (GO:0098590)	31	2.54	0.000343
thermosensory behavior (GO:0040040)	5	6.97	0.0405	signal transducer activity (GO:0004871)	44	2.23	0.000352	axon part (GO:0033267)	17	4.23	9.67e-05	phototransduction (GO:0007602)	22	9.26	3.94e-11	sequence-specific double-stranded DNA binding (GO:1990837)	27	2.24	0.0175	plasma membrane bounded cell projection (GO:0120025)	59	2.47	1.25e-07
heart process (GO:0003015)	5	6.97	0.0403	purine ribonucleotide binding (GO:0032555)	68	2.14	6.16e-06	distal axon (GO:0150034)	16	4.18	0.000191	terpenoid metabolic process (GO:0006721)	4	9.26	0.0359	transferase activity, transferring phosphorus-containing groups (GO:0016772)	41	2.08	0.00262	synapse part (GO:0044456)	22	2.46	0.00657
sarcomere organization (GO:0045214)	9	6.65	0.00175	purine nucleotide binding (GO:0017076)	68	2.13	5.43e-06	neuron projection terminus (GO:0044306)	12	4.18	0.00214	regulation of crystal cell differentiation (GO:0042689)	4	9.26	0.0358	transcription regulator activity (GO:0140110)	51	1.94	0.00208	cell projection (GO:0042995)	59	2.46	1.3e-07
regulation of calcium ion transport (GO:0051924)	5	6.61	0.046	purine ribonucleoside triphosphate binding (GO:0035639)	67	2.12	6.83e-06	synaptic vesicle (GO:0008021)	11	4.12	0.00389	leg disc proximal/distal pattern formation (GO:0007479)	6	9.26	0.00426	DNA binding (GO:0003677)	66	1.8	0.00124	synapse (GO:0045202)	30	2.46	0.000666
oocyte microtubule cytoskeleton polarization (GO:0008103)	5	6.61	0.0459	ribonucleotide binding (GO:0032553)	68	2.11	7.51e-06	vesicle membrane (GO:0012506)	11	4	0.00481	regulation of rhodopsin mediated signaling pathway (GO:0022400)	7	9.01	0.0016	protein binding (GO:0005515)	156	1.61	1.07e-06	neuron projection (GO:0043005)	36	2.25	0.000673
striated muscle cell development (GO:0055002)	16	6.58	3.88e-06	protein binding (GO:0005515)	182	2.04	1.02e-17	cytoplasmic vesicle membrane (GO:0030659)	10	3.98	0.00817	detection of light stimulus (GO:0009583)	24	8.97	6.47e-12	ion binding (GO:0043167)	120	1.37	0.0307	neuron part (GO:0097458)	44	2.07	0.000677
adenylate cyclase-inhibiting G-protein coupled receptor signaling pathway (GO:0007193)	6	6.55	0.0219	nucleoside-triphosphatase activity (GO:0017111)	45	2.04	0.00138	synapse part (GO:0044456)	32	3.88	5.66e-08	cell-cell adhesion via plasma-membrane adhesion molecules (GO:0098742)	23	8.73	3.14e-11	binding (GO:0005488)	293	1.3	9.36e-06	cell projection part (GO:0044463)	34	2.01	0.00679
cyclic-nucleotide-mediated signaling (GO:0019935)	13	6.53	5.41e-05	anion binding (GO:0043168)	87	2.01	1.29e-06	axon (GO:0030424)	31	3.83	1.21e-07	photoreceptor cell maintenance (GO:0045494)	6	8.68	0.00532	catalytic activity, acting on RNA (GO:0140098)	1	0.09	0.0294	plasma membrane bounded cell projection part (GO:0120038)	34	2.01	0.00667
adenylate cyclase-activating G-protein coupled receptor signaling pathway (GO:0007189)	8	6.48	0.00453	pyrophosphatase activity (GO:0016462)	45	1.97	0.00252	cell cortex region (GO:0099738)	9	3.83	0.0188	retina homeostasis (GO:0001895)	7	8.53	0.00205					intrinsic component of membrane (GO:0031224)	123	1.96	4.05e-10
muscle cell development (GO:0055001)	16	6.48	4.63e-06	hydrolase activity, acting on acid anhydrides (GO:0016817)	46	1.97	0.00206	synapse (GO:0045202)	39	3.46	1.67e-08	proximal/distal pattern formation, imaginal disc (GO:0007449)	7	8.53	0.00204					integral component of membrane (GO:0016021)	119	1.92	2.5e-09
'de novo' protein folding (GO:0006458)	9	6.46	0.00209	nucleotide binding (GO:0000166)	73	1.96	3.43e-05	cell body (GO:0044297)	18	3.32	0.000768	oenocyte differentiation (GO:0001742)	4	8.42	0.0452					membrane part (GO:0044425)	154	1.75	7.42e-10
adenylate cyclase-modulating G-protein coupled receptor signaling pathway (GO:0007188)	12	6.28	0.000186	nucleoside phosphate binding (GO:1901265)	73	1.96	3.15e-05	ion channel complex (GO:0034702)	9	3.23	0.0445	negative regulation of cell fate commitment (GO:0010454)	8	8.42	0.000778					membrane (GO:0016020)	202	1.74	2.06e-13
muscle tissue development (GO:0060537)	6	6.02	0.0291	hydrolase activity, acting on acid anhydrides, in phosphorus-containing anhydrides (GO:0016818)	45	1.94	0.0043	neuronal cell body (GO:0043025)	16	3.14	0.00297	regulation of decapentaplegic signaling pathway (GO:0090097)	5	8.27	0.0172					extracellular region (GO:0005576)	80	1.64	0.00071
G-protein coupled receptor signaling pathway, coupled to cyclic nucleotide second messenger (GO:0007187)	12	5.79	0.000351	ATP binding (GO:0005524)	47	1.85	0.00585	cytoplasmic vesicle part (GO:0044433)	17	3.12	0.00223	homophilic cell adhesion via plasma membrane adhesion molecules (GO:0007156)	12	8.17	1.28e-05					extracellular region part (GO:0044421)	57	1.58	0.0173
axo-dendritic transport (GO:0008088)	9	5.79	0.00362	adenyl ribonucleotide binding (GO:0032559)	47	1.85	0.00839	polymeric cytoskeletal fiber (GO:0099513)	17	3.07	0.00253	rhodopsin metabolic process (GO:0046154)	6	8.17	0.00663					cell (GO:0005623)	359	1.18	0.000412
olfactory learning (GO:0008355)	9	5.65	0.0042	adenyl nucleotide binding (GO:0030554)	47	1.83	0.00856	microtubule (GO:0005874)	11	3	0.0303	negative regulation of cell fate specification (GO:0009996)	7	8.11	0.00253					cell part (GO:0044464)	359	1.18	0.0004
striated muscle cell differentiation (GO:0051146)	22	5.31	4.56e-07	carbohydrate derivative binding (GO:0097367)	72	1.83	0.000235	neuron part (GO:0097458)	58	2.95	4.6e-10	entrainment of circadian clock (GO:0009649)	7	8.11	0.00253					organelle (GO:0043226)	172	0.8	0.00863
intestinal stem cell homeostasis (GO:0036335)	6	5.19	0.0469	small molecule binding (GO:0036094)	74	1.78	0.000366	cell cortex part (GO:0044448)	11	2.85	0.0413	motor neuron axon guidance (GO:0008045)	26	8.03	4.86e-12					intracellular organelle (GO:0043229)	167	0.79	0.00566
regulation of microtubule cytoskeleton organization (GO:0070507)	10	5.12	0.0036	ion binding (GO:0043167)	133	1.65	6.35e-06	cell cortex (GO:0005938)	19	2.81	0.00289	cellular response to UV (GO:0034644)	5	7.72	0.0214					membrane-bounded organelle (GO:0043227)	143	0.76	0.00232
positive regulation of neuron projection development (GO:0010976)	7	5.02	0.029	organic cyclic compound binding (GO:0097159)	156	1.48	7.72e-05	neuron projection (GO:0043005)	40	2.71	3.4e-06	regulation of cell fate specification (GO:0042659)	10	7.47	0.000207					intracellular membrane-bounded organelle (GO:0043231)	128	0.72	0.000283
axon extension (GO:0048675)	7	5.02	0.0289	heterocyclic compound binding (GO:1901363)	154	1.47	0.000106	cytoskeleton (GO:0005856)	51	2.7	7.67e-08	ommatidial rotation (GO:0016318)	9	7.44	0.000566					protein-containing complex (GO:0032991)	78	0.68	0.0026
second-messenger-mediated signaling (GO:0019932)	13	4.94	0.000589	binding (GO:0005488)	302	1.46	1.26e-12	intracellular vesicle (GO:0097708)	39	2.68	6.35e-06	R7 cell development (GO:0045467)	7	7.37	0.00392					intracellular non-membrane-bounded organelle (GO:0043232)	39	0.63	0.0318
neuron projection extension (GO:1990138)	7	4.88	0.0318					cytoplasmic vesicle (GO:0031410)	39	2.68	6.09e-06	leg disc pattern formation (GO:0035223)	6	7.31	0.00979					non-membrane-bounded organelle (GO:0043228)	39	0.63	0.0314
muscle cell differentiation (GO:0042692)	23	4.85	8.7e-07					microtubule associated complex (GO:0005875)	13	2.55	0.0425	regulation of cell fate commitment (GO:0010453)	11	7.28	8.96e-05					organelle part (GO:0044422)	60	0.48	5.5e-10
actomyosin structure organization (GO:0031032)	17	4.69	6.22e-05					vesicle (GO:0031982)	40	2.5	1.92e-05	regulation of muscle organ development (GO:0048634)	5	7.24	0.0257					intracellular organelle part (GO:0044446)	55	0.45	6.19e-11
myotube differentiation (GO:0014902)	9	4.61	0.0128					apical part of cell (GO:0045177)	14	2.48	0.0402	negative chemotaxis (GO:0050919)	5	7.24	0.0256					nuclear part (GO:0044428)	21	0.39	1.4e-05
regulation of microtubule-based process (GO:0032886)	10	4.56	0.00738					cytoplasmic region (GO:0099568)	22	2.47	0.00528	regulation of G-protein coupled receptor protein signaling pathway (GO:0008277)	8	7.13	0.0018					nuclear lumen (GO:0031981)	15	0.38	0.000456
associative learning (GO:0008306)	9	4.43	0.0158					cytoskeletal part (GO:0044430)	40	2.41	4.76e-05	positive regulation of transmembrane receptor protein serine/threonine kinase signaling pathway (GO:0090100)	8	7.13	0.00179					organelle lumen (GO:0043233)	16	0.33	6.87e-06
establishment or maintenance of microtubule cytoskeleton polarity (GO:0030951)	7	4.39	0.0468					plasma membrane protein complex (GO:0098797)	16	2.35	0.0419	proximal/distal pattern formation (GO:0009954)	7	7.05	0.00472					intracellular organelle lumen (GO:0070013)	16	0.33	6.49e-06
syncytium formation by plasma membrane fusion (GO:0000768)	8	4.37	0.0292					somatodendritic compartment (GO:0036477)	23	2.35	0.00604	regulation of body fluid levels (GO:0050878)	7	7.05	0.00471					membrane-enclosed lumen (GO:0031974)	16	0.33	6.15e-06
myoblast fusion (GO:0007520)	8	4.37	0.0291					whole membrane (GO:0098805)	23	2.31	0.00696	synaptic target recognition (GO:0008039)	14	7.05	6.1e-06					catalytic complex (GO:1902494)	14	0.33	3.64e-05
syncytium formation (GO:0006949)	8	4.37	0.029					chromatin (GO:0000785)	24	2.2	0.0105	multicellular organismal homeostasis (GO:0048871)	20	7.02	1.72e-08					chromosome (GO:0005694)	7	0.29	0.00245
photoreceptor cell fate commitment (GO:0046552)	9	4.26	0.0189					bounding membrane of organelle (GO:0098588)	27	2.12	0.00935	cellular response to radiation (GO:0071478)	18	6.95	1.35e-07					transferase complex (GO:1990234)	5	0.24	0.00258
skeletal muscle organ development (GO:0060538)	9	4.26	0.0189					plasma membrane (GO:0005886)	99	2.06	4.34e-09	positive regulation of locomotion (GO:0040017)	6	6.95	0.0118					ribonucleoprotein complex (GO:1990904)	6	0.23	0.000355
regulated exocytosis (GO:0045055)	11	4.25	0.00638					microtubule cytoskeleton (GO:0015630)	25	2.02	0.0226	cell-cell adhesion (GO:0098609)	25	6.73	3.11e-10					chromosomal part (GO:0044427)	4	0.2	0.00087
neuromuscular junction development (GO:0007528)	15	4.23	0.000632					cell periphery (GO:0071944)	108	2.02	1.46e-09	detection of abiotic stimulus (GO:0009582)	25	6.58	4.55e-10					mitochondrion (GO:0005739)	6	0.17	4.38e-07
vesicle localization (GO:0051648)	16	4.14	0.000448					intrinsic component of plasma membrane (GO:0031226)	39	2	0.00264	detection of external stimulus (GO:0009581)	25	6.58	4.49e-10					envelope (GO:0031975)	3	0.16	0.000742
neurotransmitter secretion (GO:0007269)	15	4.14	0.000787					plasma membrane part (GO:0044459)	64	1.95	3.41e-05	positive regulation of endocytosis (GO:0045807)	9	6.51	0.0012					organelle envelope (GO:0031967)	3	0.16	0.000725
signal release from synapse (GO:0099643)	15	4.14	0.00078					plasma membrane bounded cell projection (GO:0120025)	43	1.95	0.00197	tissue homeostasis (GO:0001894)	16	6.5	2.05e-06					mitochondrial membrane (GO:0031966)	2	0.16	0.0116
synaptic vesicle localization (GO:0097479)	14	4.13	0.00144					cell projection (GO:0042995)	43	1.94	0.00197	female sex differentiation (GO:0046660)	7	6.48	0.00668					mitochondrial envelope (GO:0005740)	2	0.15	0.0066
neuron fate commitment (GO:0048663)	10	4.12	0.0134					integral component of plasma membrane (GO:0005887)	37	1.94	0.00506	cellular response to environmental stimulus (GO:0104004)	20	6.35	6.82e-08					mitochondrial part (GO:0044429)	3	0.15	0.000283
establishment of vesicle localization (GO:0051650)	15	4.05	0.000957					cell projection part (GO:0044463)	29	1.86	0.0404	cellular response to abiotic stimulus (GO:0071214)	20	6.35	6.76e-08					nucleoplasm part (GO:0044451)	2	0.13	0.000926
presynaptic process involved in chemical synaptic transmission (GO:0099531)	15	4.05	0.000949					plasma membrane bounded cell projection part (GO:0120038)	29	1.86	0.0399	adult chitin-containing cuticle pigmentation (GO:0048085)	7	6.24	0.00781					mitochondrial inner membrane (GO:0005743)	1	0.09	0.0113
synaptic vesicle cycle (GO:0099504)	18	4	0.0002					chromosomal part (GO:0044427)	34	1.83	0.0197	embryonic hemopoiesis (GO:0035162)	7	6.24	0.00778					organelle inner membrane (GO:0019866)	1	0.09	0.00866
synaptic vesicle exocytosis (GO:0016079)	10	3.98	0.0162					endomembrane system (GO:0012505)	75	1.75	0.000205	regulation of compound eye retinal cell programmed cell death (GO:0046669)	5	6.09	0.0434					mitochondrial protein complex (GO:0098798)	0	< 0.01	0.000796
calcium ion regulated exocytosis (GO:0017156)	10	3.98	0.0161					intracellular non-membrane-bounded organelle (GO:0043232)	94	1.65	9.92e-05	neuron recognition (GO:0008038)	27	5.9	5.31e-10					ribosome (GO:0005840)	0	< 0.01	0.00915
establishment of synaptic vesicle localization (GO:0097480)	13	3.98	0.00336					non-membrane-bounded organelle (GO:0043228)	94	1.65	9.66e-05	embryonic heart tube development (GO:0035050)	6	5.79	0.0235					mitochondrial membrane part (GO:0044455)	0	< 0.01	0.0173
synaptic vesicle transport (GO:0048489)	13	3.98	0.00334					membrane (GO:0016020)	176	1.64	1.9e-09	positive regulation of behavior (GO:0048520)	7	5.79	0.0107					ribosomal subunit (GO:0044391)	0	< 0.01	0.0122
developmental cell growth (GO:0048588)	9	3.96	0.0272					membrane part (GO:0044425)	126	1.55	3.04e-05	imaginal disc-derived genitalia development (GO:0007484)	7	5.79	0.0107
muscle organ development (GO:0007517)	14	3.95	0.00213					cytosol (GO:0005829)	51	1.55	0.0399	neuropeptide signaling pathway (GO:0007218)	14	5.69	4.85e-05
locomotor rhythm (GO:0045475)	10	3.92	0.0175					intrinsic component of membrane (GO:0031224)	88	1.52	0.00318	compound eye photoreceptor development (GO:0042051)	21	5.66	1.44e-07
vesicle-mediated transport in synapse (GO:0099003)	17	3.88	0.000483					integral component of membrane (GO:0016021)	86	1.5	0.00474	cell recognition (GO:0008037)	27	5.63	1.11e-09
positive regulation of neuron differentiation (GO:0045666)	9	3.83	0.0311					cytoplasmic part (GO:0044444)	174	1.44	1.32e-05	transmembrane receptor protein serine/threonine kinase signaling pathway (GO:0007178)	8	5.61	0.00583
muscle structure development (GO:0061061)	33	3.8	1.57e-07					protein-containing complex (GO:0032991)	149	1.4	0.000448	regulation of cell-cell adhesion (GO:0022407)	7	5.59	0.0124
intracellular signal transduction (GO:0035556)	55	3.79	8.5e-13					cytoplasm (GO:0005737)	224	1.39	1.31e-06	chitin-based cuticle sclerotization (GO:0007593)	7	5.59	0.0124
learning (GO:0007612)	10	3.75	0.0219					organelle part (GO:0044422)	159	1.37	0.000636	ectoderm development (GO:0007398)	7	5.59	0.0123
mushroom body development (GO:0016319)	11	3.73	0.0144					cell (GO:0005623)	366	1.3	1.99e-10	imaginal disc-derived male genitalia development (GO:0007485)	6	5.56	0.0271
synapse organization (GO:0050808)	26	3.73	6.71e-06					cell part (GO:0044464)	366	1.3	1.59e-10	rhabdomere development (GO:0042052)	10	5.51	0.00146
signal release (GO:0023061)	15	3.73	0.0021					intracellular part (GO:0044424)	310	1.29	5.58e-07	eye photoreceptor cell development (GO:0042462)	21	5.46	2.4e-07
mesoderm development (GO:0007498)	15	3.73	0.00208					intracellular (GO:0005622)	310	1.28	7.16e-07	genitalia development (GO:0048806)	8	5.45	0.00678
regulation of neuron projection development (GO:0010975)	14	3.59	0.00454					intracellular organelle part (GO:0044446)	144	1.28	0.0286	reproductive system development (GO:0061458)	19	5.3	1.86e-06
regulation of neurotransmitter levels (GO:0001505)	20	3.56	0.000269					intracellular organelle (GO:0043229)	240	1.23	0.0023	reproductive structure development (GO:0048608)	19	5.3	1.85e-06
somatic muscle development (GO:0007525)	12	3.54	0.0127					organelle (GO:0043226)	242	1.22	0.00314	cell fate commitment involved in pattern specification (GO:0060581)	8	5.29	0.00774
chemical synaptic transmission (GO:0007268)	31	3.54	1.48e-06									response to light stimulus (GO:0009416)	33	5.23	4.55e-11
anterograde trans-synaptic signaling (GO:0098916)	31	3.54	1.45e-06									renal system development (GO:0072001)	17	5.18	1.21e-05
cellular component assembly involved in morphogenesis (GO:0010927)	20	3.54	0.000291									urogenital system development (GO:0001655)	17	5.18	1.2e-05
negative regulation of cell cycle process (GO:0010948)	9	3.53	0.0447									imaginal disc-derived leg segmentation (GO:0036011)	6	5.15	0.0358
trans-synaptic signaling (GO:0099537)	31	3.51	1.68e-06									cellular response to growth factor stimulus (GO:0071363)	8	5.15	0.00877
neurotransmitter transport (GO:0006836)	18	3.5	0.000837									axon choice point recognition (GO:0016198)	6	5.15	0.0357
regulation of cellular localization (GO:0060341)	17	3.5	0.00142									appendage segmentation (GO:0035285)	6	5.15	0.0356
regulation of cell morphogenesis involved in differentiation (GO:0010769)	11	3.5	0.0206									antennal development (GO:0007469)	6	5.15	0.0356
positive regulation of neurogenesis (GO:0050769)	11	3.5	0.0205									R7 cell differentiation (GO:0045466)	10	5.15	0.00225
synaptic signaling (GO:0099536)	31	3.49	1.81e-06									genital disc development (GO:0035215)	11	5.1	0.00119
circadian behavior (GO:0048512)	10	3.49	0.0317									regulation of hemocyte differentiation (GO:0045610)	7	5.07	0.0193
exocytosis (GO:0006887)	14	3.48	0.00579									embryonic organ development (GO:0048568)	12	5.05	0.00063
brain development (GO:0007420)	16	3.46	0.00244									establishment of ommatidial planar polarity (GO:0042067)	13	5.02	0.000329
cognition (GO:0050890)	22	3.41	0.000181									response to growth factor (GO:0070848)	8	5.01	0.0101
learning or memory (GO:0007611)	22	3.41	0.000179									cGMP metabolic process (GO:0046068)	6	4.96	0.041
response to ethanol (GO:0045471)	10	3.39	0.0366									sex differentiation (GO:0007548)	21	4.91	1.14e-06
rhythmic behavior (GO:0007622)	10	3.39	0.0365									development of primary sexual characteristics (GO:0045137)	11	4.9	0.00155
axonogenesis (GO:0007409)	42	3.39	2.19e-08									gonad development (GO:0008406)	11	4.9	0.00155
axon development (GO:0061564)	43	3.35	1.86e-08									photoreceptor cell development (GO:0042461)	22	4.85	6.59e-07
motor neuron axon guidance (GO:0008045)	10	3.35	0.0395									eye-antennal disc development (GO:0035214)	14	4.84	0.000224
small GTPase mediated signal transduction (GO:0007264)	13	3.33	0.0126									axon guidance (GO:0007411)	53	4.79	9.98e-17
transport along microtubule (GO:0010970)	10	3.3	0.0419									regulation of heart contraction (GO:0008016)	6	4.79	0.0464
G-protein coupled receptor signaling pathway (GO:0007186)	27	3.27	3.25e-05									regulation of blood circulation (GO:1903522)	6	4.79	0.0463
microtubule-based transport (GO:0099111)	10	3.26	0.0441									regulation of transmembrane receptor protein serine/threonine kinase signaling pathway (GO:0090092)	13	4.78	0.000493
memory (GO:0007613)	15	3.22	0.00706									cuticle pattern formation (GO:0035017)	7	4.77	0.0245
regulation of cell growth (GO:0001558)	10	3.22	0.047									formation of animal organ boundary (GO:0010160)	8	4.75	0.0128
regulation of secretion by cell (GO:1903530)	11	3.21	0.0331									neuron projection guidance (GO:0097485)	54	4.72	8.88e-17
regulation of vesicle-mediated transport (GO:0060627)	14	3.14	0.0128									G-protein coupled receptor signaling pathway (GO:0007186)	42	4.7	8.34e-13
regulation of membrane potential (GO:0042391)	11	3.1	0.0404									cell adhesion (GO:0007155)	31	4.66	2.15e-09
locomotory behavior (GO:0007626)	22	3.09	0.00063									taxis (GO:0042330)	68	4.66	6.75e-21
regulation of secretion (GO:0051046)	11	3.07	0.0425									biological adhesion (GO:0022610)	31	4.6	2.79e-09
axon guidance (GO:0007411)	31	3.04	2.19e-05									chemotaxis (GO:0006935)	54	4.51	4.6e-16
regulation of protein localization (GO:0032880)	11	3.03	0.0443									Malpighian tubule development (GO:0072002)	13	4.49	0.000811
neuron projection guidance (GO:0097485)	32	3.03	1.52e-05									renal tubule development (GO:0061326)	13	4.49	0.000807
cell-cell signaling (GO:0007267)	42	3.03	3.45e-07									G-protein coupled receptor signaling pathway, coupled to cyclic nucleotide second messenger (GO:0007187)	10	4.45	0.00533
positive regulation of cell development (GO:0010720)	12	3.01	0.0332									regulation of organ morphogenesis (GO:2000027)	18	4.43	3.67e-05
positive regulation of transport (GO:0051050)	12	2.98	0.0355									regulation of membrane potential (GO:0042391)	17	4.42	7.19e-05
circadian rhythm (GO:0007623)	14	2.95	0.0192									axonogenesis (GO:0007409)	59	4.39	4.12e-17
supramolecular fiber organization (GO:0097435)	22	2.95	0.00109									positive regulation of canonical Wnt signaling pathway (GO:0090263)	7	4.38	0.0351
regulation of transport (GO:0051049)	29	2.94	8.04e-05									segment polarity determination (GO:0007367)	7	4.38	0.035
rhythmic process (GO:0048511)	14	2.93	0.0204									establishment of tissue polarity (GO:0007164)	18	4.34	4.73e-05
chemotaxis (GO:0006935)	32	2.9	3.21e-05									establishment of planar polarity (GO:0001736)	18	4.34	4.7e-05
head development (GO:0060322)	16	2.89	0.0121									formation of anatomical boundary (GO:0048859)	9	4.34	0.011
positive regulation of nervous system development (GO:0051962)	13	2.89	0.0309									animal organ formation (GO:0048645)	9	4.34	0.0109
actin cytoskeleton organization (GO:0030036)	27	2.88	0.000232									axon development (GO:0061564)	60	4.32	4.18e-17
regulation of cytoskeleton organization (GO:0051493)	17	2.88	0.00866									positive regulation of Wnt signaling pathway (GO:0030177)	8	4.31	0.0212
adult behavior (GO:0030534)	18	2.88	0.00611									response to radiation (GO:0009314)	34	4.26	2.09e-09
positive regulation of cell differentiation (GO:0045597)	12	2.82	0.0483									regulation of cell adhesion (GO:0030155)	9	4.25	0.0123
regulation of neuron differentiation (GO:0045664)	17	2.75	0.0128									regulation of system process (GO:0044057)	11	4.25	0.00411
regulation of plasma membrane bounded cell projection organization (GO:0120035)	14	2.75	0.0313									cell morphogenesis involved in neuron differentiation (GO:0048667)	74	4.22	1.01e-20
negative regulation of cellular component organization (GO:0051129)	16	2.73	0.0183									regulation of endocytosis (GO:0030100)	10	4.21	0.00739
regulation of cell projection organization (GO:0031344)	14	2.72	0.033									negative regulation of neuromuscular junction development (GO:1904397)	8	4.21	0.0235
border follicle cell migration (GO:0007298)	13	2.72	0.0441									negative regulation of synaptic growth at neuromuscular junction (GO:0045886)	8	4.21	0.0234
neuron projection morphogenesis (GO:0048812)	45	2.72	1.43e-06									leg disc morphogenesis (GO:0007478)	15	4.19	0.000448
response to nitrogen compound (GO:1901698)	16	2.71	0.0191									cell projection morphogenesis (GO:0048858)	75	4.16	1.1e-20
regulation of localization (GO:0032879)	43	2.71	2.65e-06									positive regulation of transport (GO:0051050)	18	4.13	8.35e-05
secretion by cell (GO:0032940)	19	2.71	0.00784									neuron projection morphogenesis (GO:0048812)	74	4.12	2.64e-20
plasma membrane bounded cell projection morphogenesis (GO:0120039)	45	2.71	1.46e-06									negative regulation of synapse assembly (GO:0051964)	8	4.12	0.0256
cell projection morphogenesis (GO:0048858)	45	2.7	1.46e-06									negative regulation of synapse organization (GO:1905809)	8	4.12	0.0256
regulation of developmental growth (GO:0048638)	23	2.7	0.00234									plasma membrane bounded cell projection morphogenesis (GO:0120039)	74	4.11	2.89e-20
neuron projection development (GO:0031175)	47	2.69	9.27e-07									morphogenesis of a polarized epithelium (GO:0001738)	19	4.07	5.34e-05
cell morphogenesis involved in neuron differentiation (GO:0048667)	43	2.66	6.35e-06									cell part morphogenesis (GO:0032990)	75	4.07	2.77e-20
actin filament-based process (GO:0030029)	27	2.65	0.000801									developmental pigmentation (GO:0048066)	17	4.06	0.000188
cell part morphogenesis (GO:0032990)	45	2.65	3.43e-06									imaginal disc-derived leg morphogenesis (GO:0007480)	14	4.05	0.00107
ovarian follicle cell migration (GO:0007297)	14	2.64	0.0404									compound eye photoreceptor cell differentiation (GO:0001751)	26	4.04	8.64e-07
central nervous system development (GO:0007417)	28	2.64	0.000603									renal tubule morphogenesis (GO:0061333)	8	4.03	0.0285
epithelial cell migration (GO:0010631)	17	2.63	0.0183									Malpighian tubule morphogenesis (GO:0007443)	8	4.03	0.0284
regulation of growth (GO:0040008)	31	2.62	0.000268									negative regulation of Notch signaling pathway (GO:0045746)	9	4.01	0.0172
epithelium migration (GO:0090132)	17	2.62	0.019									enzyme linked receptor protein signaling pathway (GO:0007167)	27	3.98	6.12e-07
establishment of organelle localization (GO:0051656)	20	2.6	0.00872									neuron development (GO:0048666)	99	3.98	3.66e-26
regulation of neurogenesis (GO:0050767)	23	2.6	0.00353									negative regulation of developmental growth (GO:0048640)	13	3.96	0.00217
taxis (GO:0042330)	35	2.6	0.000113									neuron projection development (GO:0031175)	75	3.96	1.05e-19
anatomical structure formation involved in morphogenesis (GO:0048646)	54	2.57	3.48e-07									photoreceptor cell fate commitment (GO:0046552)	9	3.93	0.0191
regulation of small GTPase mediated signal transduction (GO:0051056)	14	2.57	0.0478									pigmentation (GO:0043473)	18	3.93	0.000149
cytoskeleton organization (GO:0007010)	56	2.51	4.37e-07									eye photoreceptor cell differentiation (GO:0001754)	26	3.91	1.52e-06
regulation of cell cycle process (GO:0010564)	16	2.51	0.0334									leg disc development (GO:0035218)	17	3.9	0.000292
regulation of cell differentiation (GO:0045595)	35	2.5	0.000187									cell morphogenesis involved in differentiation (GO:0000904)	76	3.89	1.33e-19
regulation of nervous system development (GO:0051960)	32	2.5	0.000474									negative regulation of developmental process (GO:0051093)	32	3.88	5.13e-08
tissue migration (GO:0090130)	17	2.5	0.028									regulation of organ growth (GO:0046620)	9	3.86	0.0211
neuron development (GO:0048666)	57	2.48	3.92e-07									adult locomotory behavior (GO:0008344)	14	3.81	0.00173
developmental growth (GO:0048589)	18	2.48	0.0309									neuron fate commitment (GO:0048663)	10	3.8	0.0134
positive regulation of cellular component organization (GO:0051130)	26	2.48	0.00315									negative regulation of multicellular organismal process (GO:0051241)	30	3.74	3.49e-07
signaling (GO:0023052)	128	2.48	1.48e-17									compound eye morphogenesis (GO:0001745)	42	3.73	5.25e-10
signal transduction (GO:0007165)	105	2.48	6.72e-14									cell morphogenesis (GO:0000902)	84	3.73	1.1e-20
cellular response to organic substance (GO:0071310)	24	2.48	0.00572									negative regulation of cell differentiation (GO:0045596)	18	3.72	0.000281
regulation of organelle organization (GO:0033043)	38	2.46	9.75e-05									neuron differentiation (GO:0030182)	109	3.72	3.21e-26
regulation of cell development (GO:0060284)	27	2.46	0.00262									eye photoreceptor cell fate commitment (GO:0042706)	8	3.71	0.0424
cellular component morphogenesis (GO:0032989)	63	2.45	1.56e-07									compound eye photoreceptor fate commitment (GO:0001752)	8	3.71	0.0423
locomotion (GO:0040011)	61	2.44	1.95e-07									lymph gland development (GO:0048542)	8	3.71	0.0422
cell morphogenesis involved in differentiation (GO:0000904)	44	2.44	2.75e-05									transmembrane receptor protein tyrosine kinase signaling pathway (GO:0007169)	19	3.67	0.000195
secretion (GO:0046903)	19	2.43	0.0259									regulation of stem cell proliferation (GO:0072091)	9	3.66	0.0273
ameboidal-type cell migration (GO:0001667)	17	2.41	0.044									sleep (GO:0030431)	9	3.66	0.0272
cell communication (GO:0007154)	130	2.4	9.13e-17									photoreceptor cell differentiation (GO:0046530)	27	3.66	2.74e-06
neuron differentiation (GO:0030182)	65	2.4	1.17e-07									sensory organ morphogenesis (GO:0090596)	43	3.65	5.36e-10
response to organic substance (GO:0010033)	46	2.38	2.42e-05									eye morphogenesis (GO:0048592)	43	3.65	5.29e-10
growth (GO:0040007)	18	2.37	0.0379									exocrine system development (GO:0035272)	20	3.65	0.000122
cell migration (GO:0016477)	27	2.35	0.00417									salivary gland development (GO:0007431)	20	3.65	0.000121
organelle localization (GO:0051640)	23	2.35	0.0123									muscle organ development (GO:0007517)	14	3.64	0.00253
negative regulation of signal transduction (GO:0009968)	29	2.34	0.00355									wing disc dorsal/ventral pattern formation (GO:0048190)	8	3.63	0.0462
behavior (GO:0007610)	52	2.32	8.94e-06									gland morphogenesis (GO:0022612)	16	3.63	0.000993
establishment or maintenance of cell polarity (GO:0007163)	20	2.31	0.0277									embryonic hindgut morphogenesis (GO:0048619)	8	3.63	0.0461
regulation of cellular component biogenesis (GO:0044087)	28	2.31	0.00515									salivary gland morphogenesis (GO:0007435)	16	3.63	0.000989
cell morphogenesis (GO:0000902)	48	2.31	2.96e-05									regulation of circadian rhythm (GO:0042752)	13	3.63	0.00429
positive regulation of developmental process (GO:0051094)	19	2.3	0.0349									developmental growth involved in morphogenesis (GO:0060560)	13	3.63	0.00427
movement of cell or subcellular component (GO:0006928)	64	2.28	9.9e-07									sensory perception of sound (GO:0007605)	10	3.62	0.0181
regulation of cell proliferation (GO:0042127)	20	2.27	0.0309									negative regulation of cell development (GO:0010721)	12	3.61	0.00702
positive regulation of intracellular signal transduction (GO:1902533)	18	2.25	0.0498									gland development (GO:0048732)	27	3.59	3.71e-06
regulation of cellular component organization (GO:0051128)	69	2.24	3.53e-07									negative regulation of nervous system development (GO:0051961)	17	3.55	0.000762
positive regulation of molecular function (GO:0044093)	21	2.24	0.0365									adult behavior (GO:0030534)	24	3.54	2.29e-05
establishment of localization in cell (GO:0051649)	68	2.24	4.29e-07									humoral immune response (GO:0006959)	12	3.52	0.00822
regulation of protein phosphorylation (GO:0001932)	21	2.23	0.0368									second-messenger-mediated signaling (GO:0019932)	10	3.51	0.0214
generation of neurons (GO:0048699)	74	2.2	2.93e-07									cell fate specification (GO:0001708)	12	3.47	0.00894
vesicle-mediated transport (GO:0016192)	42	2.2	0.000448									cellular carbohydrate metabolic process (GO:0044262)	12	3.47	0.00892
negative regulation of cell communication (GO:0010648)	29	2.2	0.00903									rhythmic behavior (GO:0007622)	11	3.44	0.015
negative regulation of signaling (GO:0023057)	29	2.2	0.00898									locomotion (GO:0040011)	93	3.44	8.54e-21
plasma membrane bounded cell projection organization (GO:0120036)	53	2.2	3.29e-05									compound eye development (GO:0048749)	50	3.4	1.17e-10
intracellular transport (GO:0046907)	57	2.17	1.49e-05									brain development (GO:0007420)	17	3.39	0.00119
cell projection organization (GO:0030030)	53	2.16	4.32e-05									wing disc morphogenesis (GO:0007472)	41	3.39	9.59e-09
regulation of intracellular signal transduction (GO:1902531)	33	2.16	0.0038									generation of neurons (GO:0048699)	122	3.35	1.96e-26
regulation of phosphorylation (GO:0042325)	22	2.15	0.0361									imaginal disc-derived wing morphogenesis (GO:0007476)	39	3.32	4.22e-08
cell fate commitment (GO:0045165)	28	2.14	0.0137									eye development (GO:0001654)	52	3.32	9.1e-11
negative regulation of response to stimulus (GO:0048585)	31	2.13	0.00699									imaginal disc pattern formation (GO:0007447)	15	3.31	0.00354
regulation of molecular function (GO:0065009)	36	2.12	0.0031									cellular component morphogenesis (GO:0032989)	92	3.3	1.15e-19
regulation of developmental process (GO:0050793)	59	2.12	2.77e-05									neurogenesis (GO:0022008)	125	3.27	1.32e-26
nervous system development (GO:0007399)	89	2.11	3.37e-08									cell projection organization (GO:0030030)	87	3.27	2.59e-18
cell motility (GO:0048870)	28	2.11	0.0151									cell growth (GO:0016049)	11	3.27	0.0212
regulation of cell death (GO:0010941)	24	2.11	0.036									regulation of locomotion (GO:0040012)	9	3.26	0.0497
neurogenesis (GO:0022008)	74	2.1	1.44e-06									anatomical structure homeostasis (GO:0060249)	21	3.24	0.00033
regulation of multicellular organismal process (GO:0051239)	59	2.08	3.28e-05									positive regulation of cell development (GO:0010720)	14	3.24	0.00632
localization of cell (GO:0051674)	28	2.08	0.0169									locomotory behavior (GO:0007626)	25	3.23	5.48e-05
cell development (GO:0048468)	110	2.07	4.05e-10									sensory organ development (GO:0007423)	64	3.22	7.53e-13
columnar/cuboidal epithelial cell differentiation (GO:0002065)	27	2.05	0.0221									digestive system development (GO:0055123)	15	3.22	0.00452
positive regulation of gene expression (GO:0010628)	38	2.05	0.00355									digestive tract development (GO:0048565)	15	3.22	0.0045
ovarian follicle cell development (GO:0030707)	26	2.05	0.0287									regulation of canonical Wnt signaling pathway (GO:0060828)	10	3.22	0.0348
regulation of signal transduction (GO:0009966)	62	2.04	3.02e-05									circadian behavior (GO:0048512)	10	3.22	0.0347
cellular response to stimulus (GO:0051716)	126	2.04	2.01e-11									animal organ morphogenesis (GO:0009887)	100	3.21	1.12e-20
columnar/cuboidal epithelial cell development (GO:0002066)	26	2.04	0.0291									dendrite development (GO:0016358)	20	3.19	0.000604
regulation of signaling (GO:0023051)	70	2.04	6.28e-06									plasma membrane bounded cell projection organization (GO:0120036)	83	3.18	9.82e-17
regulation of biological quality (GO:0065008)	105	2.03	5.14e-09									regulation of Wnt signaling pathway (GO:0030111)	12	3.16	0.0172
regulation of cell communication (GO:0010646)	69	2.02	1.32e-05									negative regulation of growth (GO:0045926)	14	3.15	0.00777
anatomical structure morphogenesis (GO:0009653)	120	2.02	2e-10									dendrite morphogenesis (GO:0048813)	19	3.14	0.0011
oogenesis (GO:0048477)	49	2.01	0.00063									post-embryonic appendage morphogenesis (GO:0035120)	43	3.12	3.16e-08
cellular localization (GO:0051641)	75	1.99	5.24e-06									imaginal disc-derived appendage development (GO:0048737)	45	3.11	1.45e-08
positive regulation of macromolecule biosynthetic process (GO:0010557)	35	1.99	0.0093									imaginal disc-derived appendage morphogenesis (GO:0035114)	44	3.11	2.32e-08
regulation of multicellular organismal development (GO:2000026)	41	1.98	0.00354									post-embryonic animal organ morphogenesis (GO:0048563)	52	3.1	7.66e-10
regulation of response to stimulus (GO:0048583)	76	1.98	6.36e-06									imaginal disc morphogenesis (GO:0007560)	52	3.1	7.57e-10
positive regulation of RNA biosynthetic process (GO:1902680)	31	1.98	0.022									wing disc pattern formation (GO:0035222)	10	3.09	0.0432
positive regulation of transcription, DNA-templated (GO:0045893)	31	1.98	0.022									peripheral nervous system development (GO:0007422)	12	3.09	0.0202
positive regulation of nucleic acid-templated transcription (GO:1903508)	31	1.98	0.0219									appendage morphogenesis (GO:0035107)	44	3.08	2.95e-08
tissue development (GO:0009888)	82	1.97	2.26e-06									ventral cord development (GO:0007419)	11	3.07	0.0301
regulation of catalytic activity (GO:0050790)	28	1.94	0.0442									appendage development (GO:0048736)	45	3.07	2.16e-08
microtubule-based process (GO:0007017)	35	1.94	0.0151									dorsal closure (GO:0007391)	14	3.06	0.00968
cell differentiation (GO:0030154)	130	1.94	2.28e-10									regulation of behavior (GO:0050795)	12	3.05	0.0215
regulation of protein modification process (GO:0031399)	27	1.94	0.0419									response to external stimulus (GO:0009605)	117	3.05	9.09e-23
positive regulation of nucleobase-containing compound metabolic process (GO:0045935)	33	1.94	0.0226									synapse organization (GO:0050808)	23	3.04	0.000319
positive regulation of macromolecule metabolic process (GO:0010604)	56	1.92	0.000574									positive regulation of cell differentiation (GO:0045597)	14	3.03	0.0104
cellular developmental process (GO:0048869)	132	1.92	2.33e-10									chaeta development (GO:0022416)	11	3	0.035
positive regulation of RNA metabolic process (GO:0051254)	31	1.91	0.028									molting cycle (GO:0042303)	12	2.99	0.0244
regulation of protein metabolic process (GO:0051246)	49	1.9	0.00234									molting cycle, chitin-based cuticle (GO:0007591)	12	2.99	0.0244
cell surface receptor signaling pathway (GO:0007166)	32	1.89	0.0308									metamorphosis (GO:0007552)	60	2.98	9.16e-11
response to chemical (GO:0042221)	83	1.89	6.71e-06									mesoderm development (GO:0007498)	13	2.98	0.0173
positive regulation of cellular biosynthetic process (GO:0031328)	36	1.89	0.0192									post-embryonic animal organ development (GO:0048569)	58	2.97	2.46e-10
positive regulation of biosynthetic process (GO:0009891)	36	1.89	0.0191									negative regulation of cell proliferation (GO:0008285)	11	2.96	0.037
female gamete generation (GO:0007292)	51	1.89	0.00223									regulation of response to external stimulus (GO:0032101)	17	2.96	0.00426
system development (GO:0048731)	126	1.88	5.22e-09									instar larval or pupal morphogenesis (GO:0048707)	56	2.95	6.24e-10
positive regulation of metabolic process (GO:0009893)	59	1.87	0.000553									nervous system development (GO:0007399)	134	2.93	6.64e-25
tube morphogenesis (GO:0035239)	37	1.87	0.0175									regulation of cell differentiation (GO:0045595)	44	2.9	1.36e-07
epithelial cell differentiation (GO:0030855)	30	1.86	0.0483									regulation of vesicle-mediated transport (GO:0060627)	14	2.89	0.0147
positive regulation of nitrogen compound metabolic process (GO:0051173)	53	1.85	0.00233									hematopoietic or lymphoid organ development (GO:0048534)	11	2.89	0.0429
post-embryonic animal morphogenesis (GO:0009886)	33	1.83	0.0405									rhythmic process (GO:0048511)	15	2.89	0.0103
positive regulation of cellular metabolic process (GO:0031325)	54	1.82	0.00294									immune system development (GO:0002520)	11	2.89	0.0429
animal organ development (GO:0048513)	85	1.82	2.21e-05									pigment metabolic process (GO:0042440)	16	2.87	0.00775
negative regulation of biological process (GO:0048519)	97	1.81	3.81e-06									heart development (GO:0007507)	13	2.87	0.0228
regulation of cellular protein metabolic process (GO:0032268)	44	1.81	0.0128									circulatory system development (GO:0072359)	13	2.87	0.0227
negative regulation of cellular process (GO:0048523)	84	1.81	2.86e-05									post-embryonic animal morphogenesis (GO:0009886)	56	2.86	1.68e-09
tissue morphogenesis (GO:0048729)	43	1.78	0.0172									regulation of synapse structure or activity (GO:0050803)	21	2.86	0.00143
regulation of cellular process (GO:0050794)	247	1.78	4.72e-19									regulation of cell development (GO:0060284)	34	2.85	1.17e-05
germ cell development (GO:0007281)	52	1.78	0.00523									regulation of neuron differentiation (GO:0045664)	19	2.84	0.00309
animal organ morphogenesis (GO:0009887)	51	1.78	0.00651									head development (GO:0060322)	17	2.83	0.0063
pattern specification process (GO:0007389)	35	1.76	0.0443									morphogenesis of embryonic epithelium (GO:0016331)	15	2.82	0.0124
biological regulation (GO:0065007)	296	1.76	1.11e-24									cell fate determination (GO:0001709)	18	2.8	0.00507
response to stimulus (GO:0050896)	184	1.75	6.88e-12									regulation of multicellular organismal process (GO:0051239)	86	2.8	2.31e-14
morphogenesis of an epithelium (GO:0002009)	41	1.75	0.0277									morphogenesis of an epithelium (GO:0002009)	71	2.79	1.26e-11
anatomical structure development (GO:0048856)	185	1.74	8.49e-12									tissue morphogenesis (GO:0048729)	73	2.79	5.94e-12
regulation of biological process (GO:0050789)	260	1.73	4.92e-19									regulation of neuromuscular junction development (GO:1904396)	13	2.79	0.0271
gamete generation (GO:0007276)	65	1.73	0.00216									response to wounding (GO:0009611)	12	2.78	0.0385
nitrogen compound transport (GO:0071705)	38	1.73	0.0474									positive regulation of multicellular organismal process (GO:0051240)	26	2.77	0.000363
developmental process (GO:0032502)	190	1.72	7.88e-12									regulation of Notch signaling pathway (GO:0008593)	14	2.77	0.0208
regulation of transcription by RNA polymerase II (GO:0006357)	47	1.72	0.0175									muscle structure development (GO:0061061)	26	2.76	0.000386
positive regulation of biological process (GO:0048518)	96	1.71	4.99e-05									negative regulation of signal transduction (GO:0009968)	37	2.76	7.57e-06
multicellular organism development (GO:0007275)	157	1.71	5.81e-09									epithelial tube morphogenesis (GO:0060562)	55	2.75	9.27e-09
multicellular organismal reproductive process (GO:0048609)	74	1.68	0.00144									regulation of anatomical structure morphogenesis (GO:0022603)	30	2.75	0.000102
positive regulation of cellular process (GO:0048522)	84	1.67	0.000448									cell fate commitment (GO:0045165)	39	2.75	3.82e-06
protein localization (GO:0008104)	43	1.67	0.0403									modulation of chemical synaptic transmission (GO:0050804)	13	2.74	0.0306
epithelium development (GO:0060429)	64	1.67	0.00454									regulation of trans-synaptic signaling (GO:0099177)	13	2.74	0.0305
response to external stimulus (GO:0009605)	59	1.67	0.00889									cell migration (GO:0016477)	34	2.73	2.63e-05
system process (GO:0003008)	48	1.66	0.0289									circadian rhythm (GO:0007623)	14	2.72	0.0233
cellular component assembly (GO:0022607)	64	1.66	0.00613									regulation of cell proliferation (GO:0042127)	26	2.72	0.000476
developmental process involved in reproduction (GO:0003006)	55	1.65	0.015									embryonic development via the syncytial blastoderm (GO:0001700)	21	2.72	0.00252
multi-organism reproductive process (GO:0044703)	73	1.64	0.00274									regulation of synapse assembly (GO:0051963)	13	2.71	0.0328
sexual reproduction (GO:0019953)	73	1.64	0.00273									regulation of developmental growth (GO:0048638)	25	2.71	0.000728
cellular component organization (GO:0016043)	167	1.63	2.2e-08									imaginal disc development (GO:0007444)	64	2.7	8.8e-10
cellular process involved in reproduction in multicellular organism (GO:0022412)	57	1.63	0.0184									signal transduction (GO:0007165)	124	2.7	2.7e-20
regulation of nitrogen compound metabolic process (GO:0051171)	116	1.59	7.37e-05									wing disc development (GO:0035220)	44	2.7	9.5e-07
regulation of macromolecule metabolic process (GO:0060255)	122	1.59	3.73e-05									movement of cell or subcellular component (GO:0006928)	82	2.69	1.04e-12
regulation of cellular metabolic process (GO:0031323)	120	1.59	4.31e-05									instar larval or pupal development (GO:0002165)	63	2.68	1.53e-09
regulation of primary metabolic process (GO:0080090)	116	1.58	0.000109									developmental growth (GO:0048589)	21	2.67	0.00301
reproductive process (GO:0022414)	77	1.57	0.00644									growth (GO:0040007)	22	2.67	0.00225
localization (GO:0051179)	133	1.57	1.97e-05									positive regulation of nervous system development (GO:0051962)	13	2.66	0.0366
cellular component organization or biogenesis (GO:0071840)	168	1.57	3.7e-07									cellular response to endogenous stimulus (GO:0071495)	17	2.66	0.0106
regulation of RNA metabolic process (GO:0051252)	78	1.57	0.00564									negative regulation of cell communication (GO:0010648)	38	2.66	1.81e-05
regulation of metabolic process (GO:0019222)	128	1.56	4.14e-05									negative regulation of signaling (GO:0023057)	38	2.66	1.8e-05
regulation of RNA biosynthetic process (GO:2001141)	71	1.55	0.0127									detection of stimulus (GO:0051606)	29	2.65	0.000261
regulation of transcription, DNA-templated (GO:0006355)	71	1.55	0.0126									pattern specification process (GO:0007389)	57	2.65	1.75e-08
regulation of nucleic acid-templated transcription (GO:1903506)	71	1.55	0.0126									anterior/posterior pattern specification (GO:0009952)	19	2.63	0.00643
regulation of gene expression (GO:0010468)	92	1.54	0.00289									regulation of multicellular organismal development (GO:2000026)	59	2.63	1.07e-08
regulation of nucleobase-containing compound metabolic process (GO:0019219)	80	1.54	0.00908									embryonic morphogenesis (GO:0048598)	27	2.62	0.000606
regulation of cellular macromolecule biosynthetic process (GO:2000112)	80	1.53	0.00903									post-embryonic development (GO:0009791)	69	2.61	4.32e-10
transport (GO:0006810)	100	1.53	0.00151									regulation of neurogenesis (GO:0050767)	25	2.61	0.00119
regulation of macromolecule biosynthetic process (GO:0010556)	80	1.53	0.00931									regionalization (GO:0003002)	52	2.61	1.51e-07
organelle organization (GO:0006996)	102	1.52	0.00182									segmentation (GO:0035282)	27	2.61	0.000642
multi-organism process (GO:0051704)	85	1.51	0.00872									regulation of nervous system development (GO:0051960)	36	2.6	4.72e-05
establishment of localization (GO:0051234)	102	1.51	0.00238									behavior (GO:0007610)	63	2.59	3.96e-09
regulation of cellular biosynthetic process (GO:0031326)	81	1.49	0.0142									cell communication (GO:0007154)	151	2.58	3.61e-23
regulation of biosynthetic process (GO:0009889)	81	1.49	0.0174									regulation of synapse organization (GO:0050807)	16	2.57	0.0195
multicellular organismal process (GO:0032501)	212	1.48	9.36e-08									animal organ development (GO:0048513)	130	2.56	1.3e-19
multicellular organism reproduction (GO:0032504)	76	1.44	0.0482									establishment or maintenance of cell polarity (GO:0007163)	24	2.56	0.00281
cellular process (GO:0009987)	359	1.36	8.26e-13									embryo development ending in birth or egg hatching (GO:0009792)	21	2.56	0.00479
biological_process (GO:0008150)	482	1.07	0.0213									tube morphogenesis (GO:0035239)	55	2.56	9.13e-08
Unclassified (UNCLASSIFIED)	66	0.69	0.0214									signaling (GO:0023052)	143	2.56	1.25e-21
												blastoderm segmentation (GO:0007350)	22	2.55	0.00543
												negative regulation of response to stimulus (GO:0048585)	40	2.54	1.76e-05
												cell surface receptor signaling pathway (GO:0007166)	46	2.51	3.02e-06
												response to endogenous stimulus (GO:0009719)	19	2.5	0.0149
												anatomical structure morphogenesis (GO:0009653)	161	2.5	9.19e-24
												regulation of growth (GO:0040008)	32	2.5	0.000308
												regulation of developmental process (GO:0050793)	75	2.48	5.44e-10
												actin cytoskeleton organization (GO:0030036)	25	2.46	0.00275
												system development (GO:0048731)	179	2.46	4.79e-26
												tube development (GO:0035295)	74	2.46	9.56e-10
												developmental maturation (GO:0021700)	22	2.45	0.00689
												embryonic pattern specification (GO:0009880)	23	2.44	0.00531
												actin filament-based process (GO:0030029)	27	2.44	0.00171
												central nervous system development (GO:0007417)	28	2.44	0.00132
												regulation of transport (GO:0051049)	26	2.43	0.00243
												regulation of signaling (GO:0023051)	90	2.42	1.27e-11
												larval development (GO:0002164)	16	2.41	0.0428
												regulation of cell communication (GO:0010646)	89	2.41	2.05e-11
												immune system process (GO:0002376)	33	2.4	0.000566
												cell development (GO:0048468)	138	2.4	9.86e-19
												regulation of signal transduction (GO:0009966)	79	2.4	5.6e-10
												immune response (GO:0006955)	21	2.4	0.0106
												regulation of localization (GO:0032879)	41	2.39	5.22e-05
												response to abiotic stimulus (GO:0009628)	45	2.38	1.69e-05
												cell motility (GO:0048870)	34	2.36	0.000482
												positive regulation of transcription by RNA polymerase II (GO:0045944)	30	2.35	0.0016
												response to chemical (GO:0042221)	111	2.33	1.26e-13
												localization of cell (GO:0051674)	34	2.33	0.000579
												negative regulation of transcription by RNA polymerase II (GO:0000122)	18	2.33	0.0289
												sensory perception (GO:0007600)	46	2.33	2.54e-05
												protein phosphorylation (GO:0006468)	28	2.32	0.00312
												cellular developmental process (GO:0048869)	170	2.28	1.63e-21
												system process (GO:0003008)	71	2.27	4.49e-08
												cell differentiation (GO:0030154)	165	2.27	1.15e-20
												embryo development (GO:0009790)	50	2.25	2.02e-05
												carbohydrate metabolic process (GO:0005975)	24	2.24	0.0112
												nervous system process (GO:0050877)	63	2.24	7.08e-07
												positive regulation of developmental process (GO:0051094)	20	2.24	0.0334
												positive regulation of RNA metabolic process (GO:0051254)	39	2.22	0.000386
												positive regulation of nucleobase-containing compound metabolic process (GO:0045935)	41	2.22	0.000333
												regulation of programmed cell death (GO:0043067)	24	2.21	0.0123
												positive regulation of signal transduction (GO:0009967)	34	2.21	0.00144
												trans-synaptic signaling (GO:0099537)	21	2.19	0.028
												epithelium development (GO:0060429)	91	2.19	9.97e-10
												synaptic signaling (GO:0099536)	21	2.18	0.0286
												positive regulation of cell communication (GO:0010647)	36	2.18	0.00109
												positive regulation of signaling (GO:0023056)	36	2.18	0.00108
												positive regulation of RNA biosynthetic process (GO:1902680)	37	2.17	0.00119
												positive regulation of transcription, DNA-templated (GO:0045893)	37	2.17	0.00118
												positive regulation of nucleic acid-templated transcription (GO:1903508)	37	2.17	0.00118
												regulation of response to stimulus (GO:0048583)	90	2.16	2.57e-09
												cellular response to stimulus (GO:0051716)	144	2.15	9.79e-16
												positive regulation of response to stimulus (GO:0048584)	42	2.15	0.000363
												tissue development (GO:0009888)	97	2.15	6.06e-10
												homeostatic process (GO:0042592)	42	2.14	0.000581
												negative regulation of RNA biosynthetic process (GO:1902679)	30	2.14	0.00532
												negative regulation of transcription, DNA-templated (GO:0045892)	30	2.14	0.0053
												negative regulation of nucleic acid-templated transcription (GO:1903507)	30	2.14	0.00529
												cell-cell signaling (GO:0007267)	32	2.13	0.00354
												multicellular organism development (GO:0007275)	212	2.12	3.07e-24
												positive regulation of cellular component organization (GO:0051130)	24	2.11	0.0245
												chemical synaptic transmission (GO:0007268)	20	2.11	0.0457
												anterograde trans-synaptic signaling (GO:0098916)	20	2.11	0.0456
												negative regulation of nucleobase-containing compound metabolic process (GO:0045934)	33	2.11	0.00421
												negative regulation of RNA metabolic process (GO:0051253)	31	2.09	0.00705
												regulation of biological quality (GO:0065008)	117	2.09	2.03e-11
												negative regulation of cellular biosynthetic process (GO:0031327)	37	2.07	0.00261
												negative regulation of biosynthetic process (GO:0009890)	37	2.07	0.0026
												positive regulation of biological process (GO:0048518)	126	2.07	4.65e-12
												response to stimulus (GO:0050896)	233	2.05	3.71e-25
												positive regulation of cellular process (GO:0048522)	111	2.04	3.62e-10
												regulation of cell death (GO:0010941)	25	2.02	0.0255
												negative regulation of macromolecule biosynthetic process (GO:0010558)	35	2.02	0.00521
												negative regulation of cellular macromolecule biosynthetic process (GO:2000113)	35	2.02	0.00519
												positive regulation of macromolecule biosynthetic process (GO:0010557)	38	1.99	0.00413
												positive regulation of cellular biosynthetic process (GO:0031328)	41	1.99	0.00211
												positive regulation of biosynthetic process (GO:0009891)	41	1.99	0.0021
												positive regulation of nitrogen compound metabolic process (GO:0051173)	61	1.96	8.01e-05
												positive regulation of cellular metabolic process (GO:0031325)	63	1.96	5.04e-05
												positive regulation of gene expression (GO:0010628)	39	1.94	0.0055
												anatomical structure development (GO:0048856)	223	1.93	9.03e-21
												negative regulation of cellular process (GO:0048523)	97	1.93	1.26e-07
												regulation of transcription by RNA polymerase II (GO:0006357)	57	1.92	0.000281
												cellular response to chemical stimulus (GO:0070887)	28	1.91	0.034
												intracellular signal transduction (GO:0035556)	30	1.91	0.0232
												developmental process (GO:0032502)	227	1.9	1.46e-20
												negative regulation of biological process (GO:0048519)	109	1.88	4.06e-08
												negative regulation of gene expression (GO:0010629)	42	1.87	0.0052
												multicellular organismal process (GO:0032501)	288	1.86	1.42e-26
												positive regulation of metabolic process (GO:0009893)	63	1.84	0.00031
												positive regulation of macromolecule metabolic process (GO:0010604)	58	1.84	0.000707
												response to organic substance (GO:0010033)	38	1.81	0.0149
												regulation of cellular process (GO:0050794)	272	1.81	3.91e-23
												negative regulation of nitrogen compound metabolic process (GO:0051172)	43	1.76	0.0119
												regulation of biological process (GO:0050789)	286	1.76	7.26e-23
												regulation of cellular component organization (GO:0051128)	58	1.74	0.00278
												negative regulation of cellular metabolic process (GO:0031324)	45	1.72	0.016
												negative regulation of macromolecule metabolic process (GO:0010605)	50	1.72	0.00814
												anatomical structure formation involved in morphogenesis (GO:0048646)	39	1.71	0.0298
												negative regulation of metabolic process (GO:0009892)	53	1.71	0.00645
												cytoskeleton organization (GO:0007010)	41	1.7	0.0285
												biological regulation (GO:0065007)	307	1.69	1.27e-22
												cellular component organization (GO:0016043)	181	1.63	1.15e-09
												cellular component organization or biogenesis (GO:0071840)	182	1.56	2.64e-08
												phosphate-containing compound metabolic process (GO:0006796)	56	1.55	0.0299
												regulation of RNA metabolic process (GO:0051252)	83	1.54	0.00434
												regulation of RNA biosynthetic process (GO:2001141)	76	1.53	0.00726
												regulation of transcription, DNA-templated (GO:0006355)	76	1.53	0.00724
												regulation of nucleic acid-templated transcription (GO:1903506)	76	1.53	0.00722
												regulation of nucleobase-containing compound metabolic process (GO:0019219)	85	1.51	0.00559
												regulation of cellular biosynthetic process (GO:0031326)	86	1.46	0.0128
												regulation of biosynthetic process (GO:0009889)	86	1.46	0.0129
												regulation of cellular metabolic process (GO:0031323)	119	1.45	0.00131
												regulation of cellular macromolecule biosynthetic process (GO:2000112)	82	1.45	0.0211
												regulation of macromolecule biosynthetic process (GO:0010556)	82	1.44	0.0215
												regulation of nitrogen compound metabolic process (GO:0051171)	112	1.42	0.00561
												regulation of primary metabolic process (GO:0080090)	112	1.4	0.00724
												localization (GO:0051179)	129	1.4	0.00254
												regulation of gene expression (GO:0010468)	91	1.4	0.0245
												cellular process (GO:0009987)	396	1.39	8.12e-17
												regulation of macromolecule metabolic process (GO:0060255)	114	1.37	0.0126
												regulation of metabolic process (GO:0019222)	122	1.37	0.00824
												biological_process (GO:0008150)	525	1.07	0.0035
												nitrogen compound metabolic process (GO:0006807)	117	0.73	0.00147
												macromolecule metabolic process (GO:0043170)	95	0.68	0.00066
												Unclassified (UNCLASSIFIED)	69	0.66	0.00352
												organic cyclic compound metabolic process (GO:1901360)	42	0.61	0.00827
												cellular aromatic compound metabolic process (GO:0006725)	40	0.6	0.0085
												heterocycle metabolic process (GO:0046483)	38	0.59	0.00872
												cellular nitrogen compound metabolic process (GO:0034641)	43	0.55	0.000336
												nucleobase-containing compound metabolic process (GO:0006139)	33	0.54	0.00256
												macromolecule biosynthetic process (GO:0009059)	16	0.46	0.00953
												intracellular transport (GO:0046907)	12	0.42	0.0189
												cellular macromolecule biosynthetic process (GO:0034645)	12	0.35	0.000799
												nucleic acid metabolic process (GO:0090304)	16	0.34	1.21e-05
												RNA processing (GO:0006396)	7	0.32	0.00923
												RNA metabolic process (GO:0016070)	11	0.31	8.18e-05
												gene expression (GO:0010467)	11	0.24	3.96e-08
												peptide metabolic process (GO:0006518)	4	0.23	0.00742
												amide biosynthetic process (GO:0043604)	2	0.14	0.00531
												ncRNA processing (GO:0034470)	1	0.1	0.0233
												ribonucleoprotein complex biogenesis (GO:0022613)	1	0.09	0.00479
												ncRNA metabolic process (GO:0034660)	1	0.08	0.00186
												peptide biosynthetic process (GO:0043043)	1	0.07	0.00132
												purine ribonucleoside triphosphate metabolic process (GO:0009205)	0	< 0.01	0.0497
												ribonucleoside triphosphate metabolic process (GO:0009199)	0	< 0.01	0.0498
												purine nucleoside triphosphate metabolic process (GO:0009144)	0	< 0.01	0.0497
												translation (GO:0006412)	0	< 0.01	0.000154
